# Supplementary material
Source: publisher site journal article supplement (https://www.spandidos-publications.com/2021/downloadSupplementary)

Figure S1. A large crevasse (as indicated by the red arrow) was identified on the left side of the dura during the second surgery.

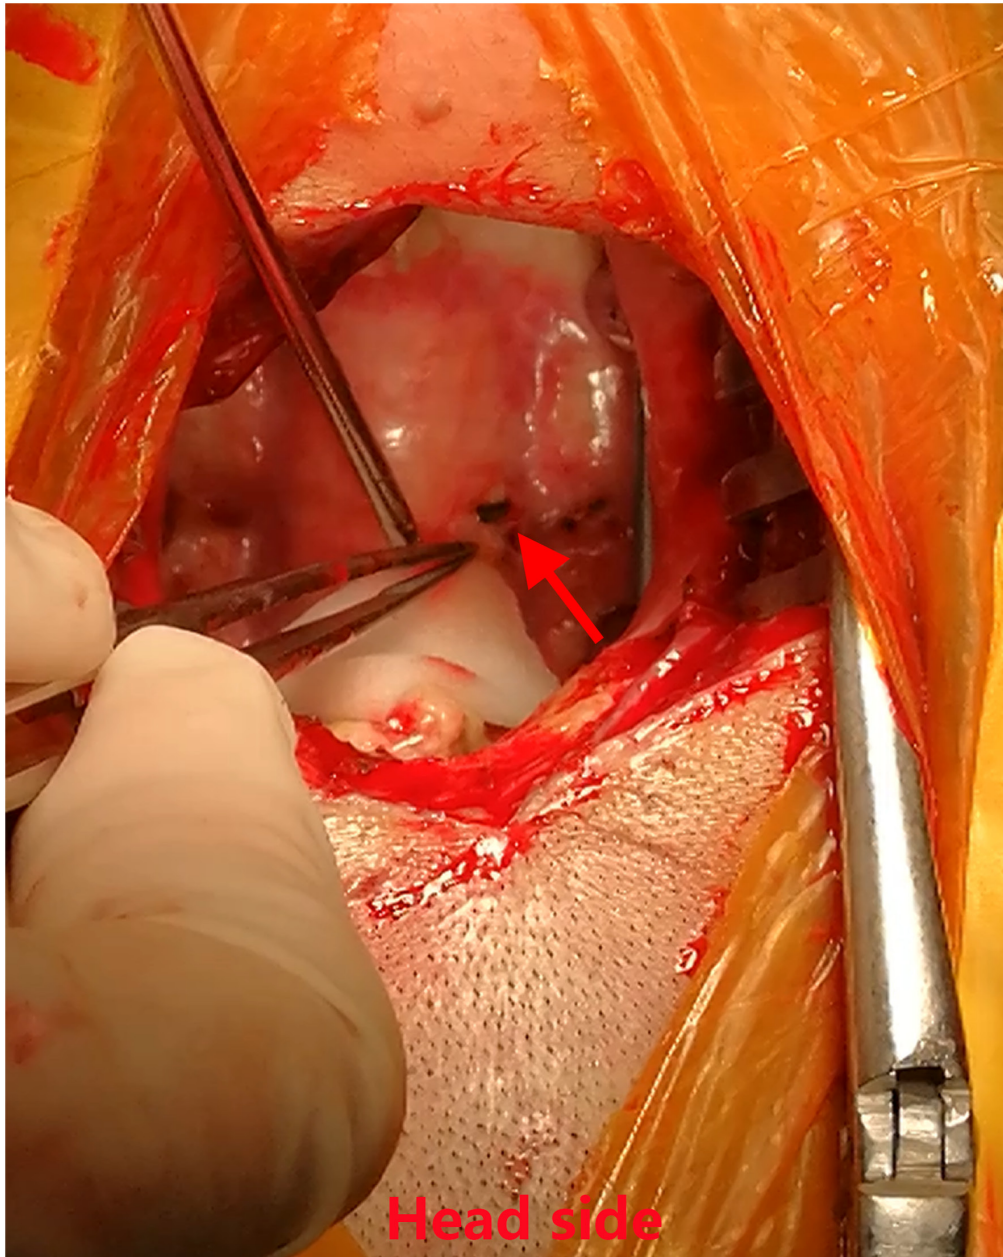

Supplement: Supplementary file 1 [file downloadSupplementary]
